# Supplementary material for: Structural and optoelectronic characteristics of β-Ga2O3 epitaxial films with Zn alloying and subsequent oxygen annealing
Source: Royal Society of Chemistry journal article supplement (doi:10.1039/d2tc05204k), 2023-01-01
Supplement: d2tc05204k1.pdf [file d2tc05204k1.pdf]

## Electronic Supplementary Information

### Structural and Optoelectronic Characteristics of $\beta$ -Ga<sub>2</sub>O<sub>3</sub> Epitaxial Films with Zn Alloying and Subsequent Oxygen Annealing

Received 00th January 20xx,  
Accepted 00th January 20xx

Xuan Sun,<sup>ab</sup> Kewei Liu,<sup>\*ab</sup> Xing Chen,<sup>ab</sup> Qichao Hou,<sup>ab</sup> Zhen Cheng,<sup>a</sup> Jialin Yang,<sup>a</sup> Qiu Ai,<sup>a</sup> Yongxue Zhu,<sup>a</sup> Binghui Li,<sup>ab</sup> Lei Liu,<sup>ab</sup> and Dezhen Shen<sup>\*ab</sup>

DOI: 10.1039/x0xx00000x

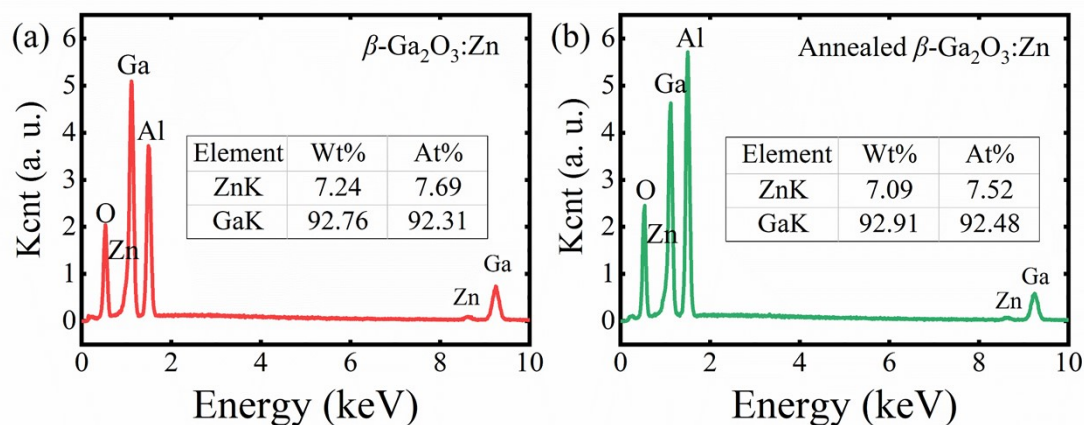

**Figure S1** EDS spectra of as-grown and annealed  $\beta$ -Ga<sub>2</sub>O<sub>3</sub>:Zn thin films.

<sup>a</sup> State Key Laboratory of Luminescence and Applications, Changchun Institute of Optics, Fine Mechanics and Physics, Chinese Academy of Sciences, No.3888 Dongnanhu Road, Changchun, 130033, People's Republic of China. E-mail: [liukw@ciomp.ac.cn](mailto:liukw@ciomp.ac.cn); [shendz@ciomp.ac.cn](mailto:shendz@ciomp.ac.cn)

<sup>b</sup> Center of Materials Science and Optoelectronics Engineering, University of the Chinese Academy of Sciences, Beijing 100049, People's Republic of China

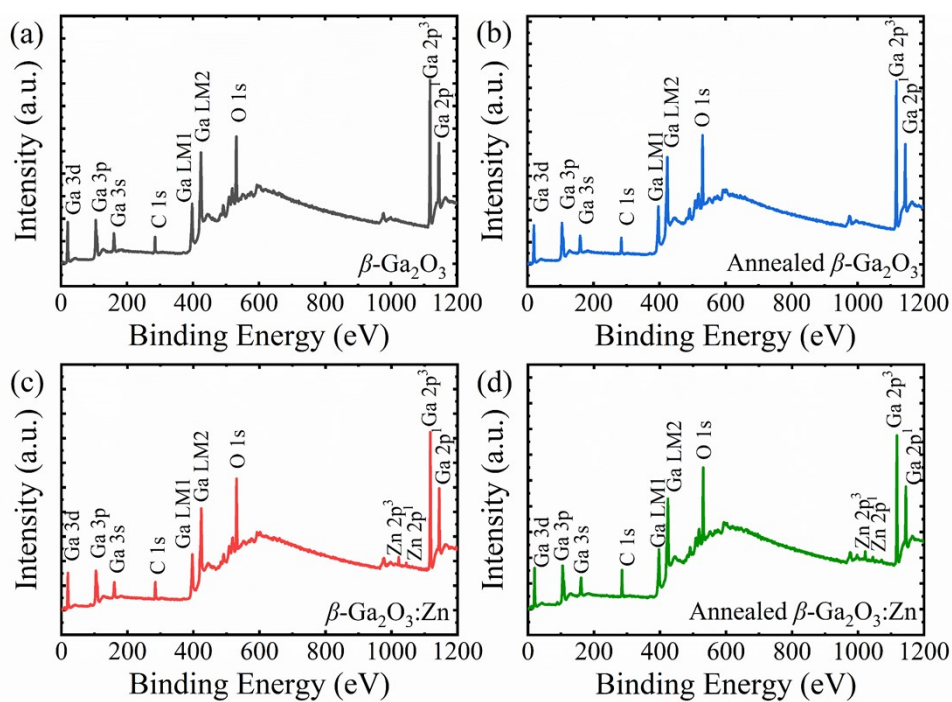

**Figure S2** XPS survey spectra of (a) pure  $\beta\text{-Ga}_2\text{O}_3$ , (b) annealed  $\beta\text{-Ga}_2\text{O}_3$ , (c)  $\beta\text{-Ga}_2\text{O}_3\text{:Zn}$  and (d) annealed  $\beta\text{-Ga}_2\text{O}_3\text{:Zn}$  films.

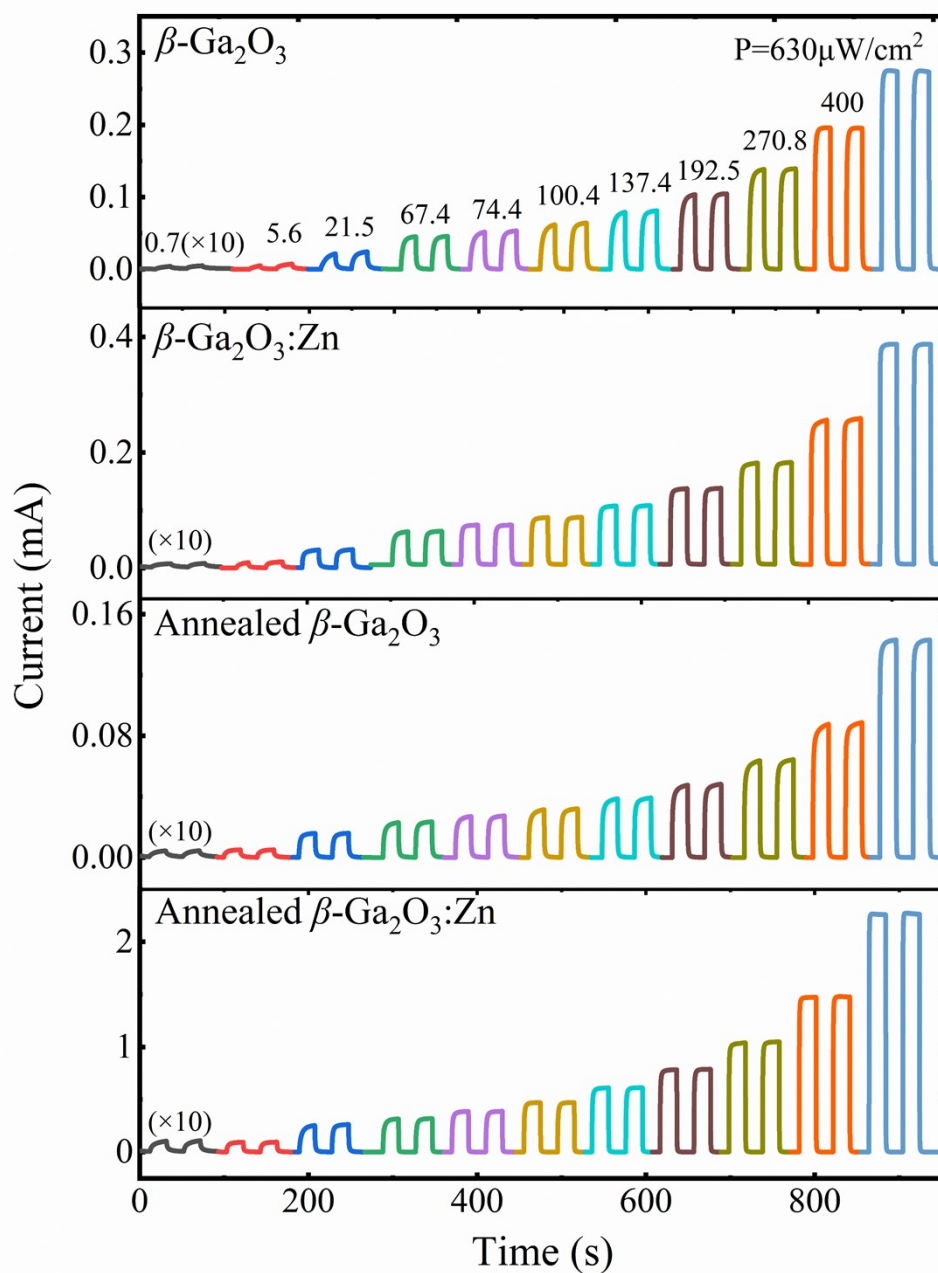

**Figure S3** Time-dependent photocurrent characteristics of the photodetectors under 254 nm illuminations with different light intensities from  $0.7 \mu\text{W}/\text{cm}^2$  to  $630 \mu\text{W}/\text{cm}^2$  at 10 V bias.
